# Supplementary material for: Identification and Expression Analysis of PIN-Like (PILS) Gene Family of Rice Treated with Auxin and Cytokinin
Source: MDPI journal article supplement (doi:10.3390/genes6030622), 2015-07-16
Supplement: s1 [file s1]

# Supplementary Information

## Supplementary Data File 1

Multiple sequence alignment of OsPIN, AtPIN and OsPILS protein. Sequence alignment shows, alignment of OsPILS starts towards the end of the OsPIN and AtPIN sequence. This shows that, OsPILS and PIN proteins are highly dissimilar in their sequence.

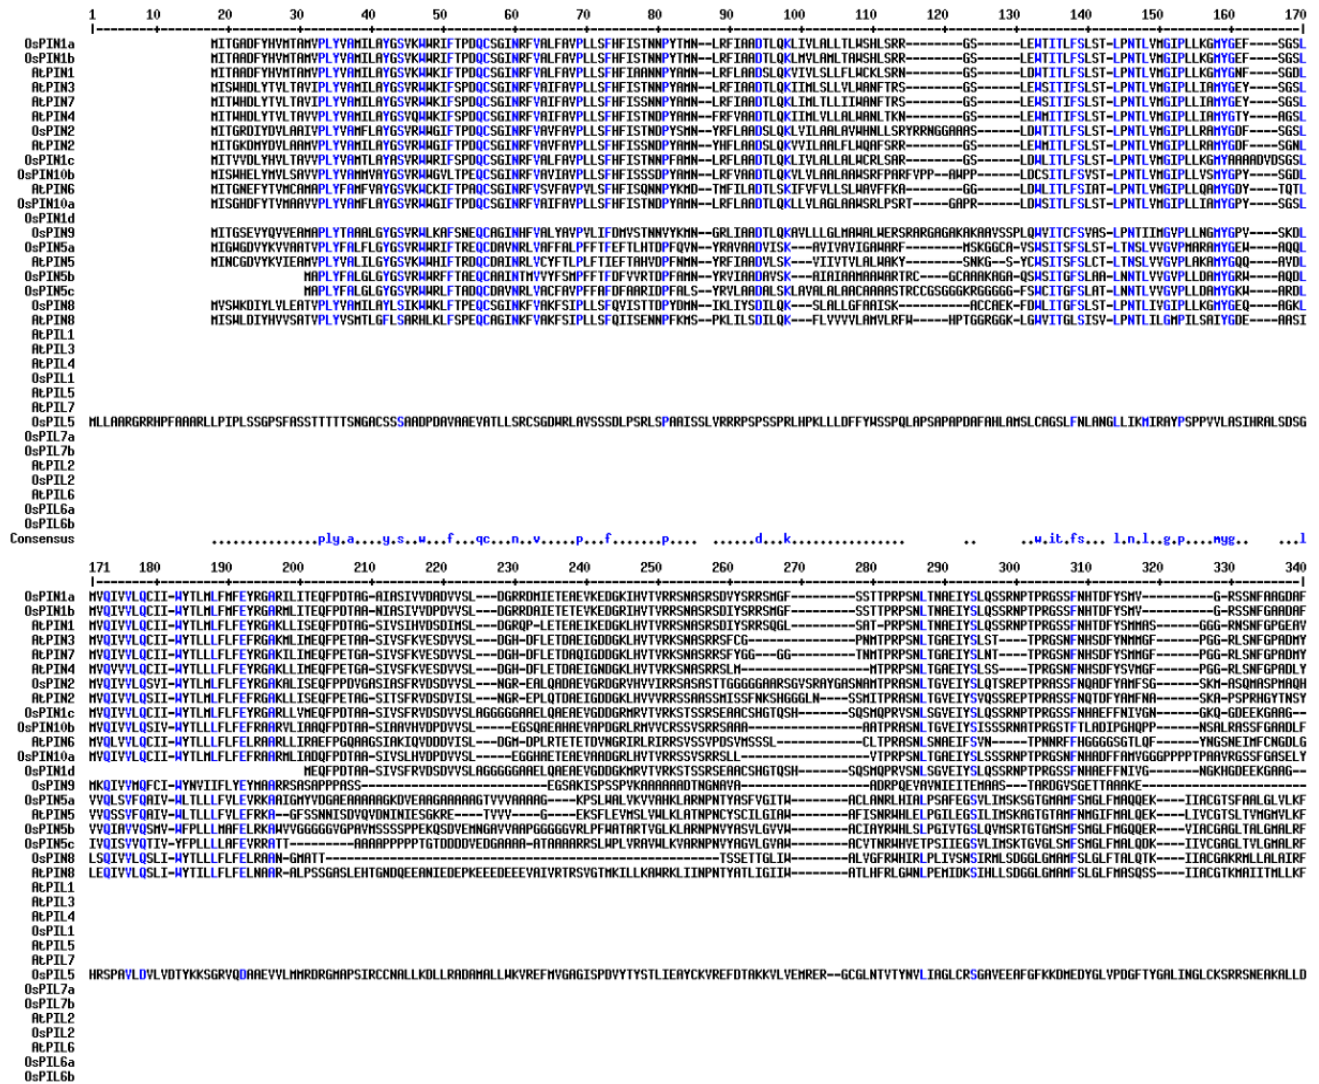

|           | 341 | 350 | 360 | 370 | 380 | 390 | 400 | 410 | 420 | 430 | 440 | 450 | 460 | 470 | 480 | 490 | 500 | 510 |
|-----------|-----|-----|-----|-----|-----|-----|-----|-----|-----|-----|-----|-----|-----|-----|-----|-----|-----|-----|
| OsP1M1a   |     |     |     |     |     |     |     |     |     |     |     |     |     |     |     |     |     |     |
| OsP1M1b   |     |     |     |     |     |     |     |     |     |     |     |     |     |     |     |     |     |     |
| AtP1N1    |     |     |     |     |     |     |     |     |     |     |     |     |     |     |     |     |     |     |
| AtP1N3    |     |     |     |     |     |     |     |     |     |     |     |     |     |     |     |     |     |     |
| AtP1N7    |     |     |     |     |     |     |     |     |     |     |     |     |     |     |     |     |     |     |
| AtP1N4    |     |     |     |     |     |     |     |     |     |     |     |     |     |     |     |     |     |     |
| OsP1N2    |     |     |     |     |     |     |     |     |     |     |     |     |     |     |     |     |     |     |
| AtP1N2    |     |     |     |     |     |     |     |     |     |     |     |     |     |     |     |     |     |     |
| OsP1N1c   |     |     |     |     |     |     |     |     |     |     |     |     |     |     |     |     |     |     |
| OsP1N1b   |     |     |     |     |     |     |     |     |     |     |     |     |     |     |     |     |     |     |
| AtP1N6    |     |     |     |     |     |     |     |     |     |     |     |     |     |     |     |     |     |     |
| OsP1M1a   |     |     |     |     |     |     |     |     |     |     |     |     |     |     |     |     |     |     |
| OsP1M1d   |     |     |     |     |     |     |     |     |     |     |     |     |     |     |     |     |     |     |
| OsP1N9    |     |     |     |     |     |     |     |     |     |     |     |     |     |     |     |     |     |     |
| AtP1N5a   |     |     |     |     |     |     |     |     |     |     |     |     |     |     |     |     |     |     |
| AtP1N5b   |     |     |     |     |     |     |     |     |     |     |     |     |     |     |     |     |     |     |
| OsP1N5c   |     |     |     |     |     |     |     |     |     |     |     |     |     |     |     |     |     |     |
| AtP1N8    |     |     |     |     |     |     |     |     |     |     |     |     |     |     |     |     |     |     |
| AtP1N8    |     |     |     |     |     |     |     |     |     |     |     |     |     |     |     |     |     |     |
| AtP1L1    |     |     |     |     |     |     |     |     |     |     |     |     |     |     |     |     |     |     |
| AtP1L3    |     |     |     |     |     |     |     |     |     |     |     |     |     |     |     |     |     |     |
| AtP1L4    |     |     |     |     |     |     |     |     |     |     |     |     |     |     |     |     |     |     |
| AtP1L1    |     |     |     |     |     |     |     |     |     |     |     |     |     |     |     |     |     |     |
| AtP1L5    |     |     |     |     |     |     |     |     |     |     |     |     |     |     |     |     |     |     |
| AtP1L7    |     |     |     |     |     |     |     |     |     |     |     |     |     |     |     |     |     |     |
| OsP1L5    |     |     |     |     |     |     |     |     |     |     |     |     |     |     |     |     |     |     |
| OsP1L7a   |     |     |     |     |     |     |     |     |     |     |     |     |     |     |     |     |     |     |
| OsP1L7b   |     |     |     |     |     |     |     |     |     |     |     |     |     |     |     |     |     |     |
| AtP1L2    |     |     |     |     |     |     |     |     |     |     |     |     |     |     |     |     |     |     |
| OsP1L2    |     |     |     |     |     |     |     |     |     |     |     |     |     |     |     |     |     |     |
| AtP1L6    |     |     |     |     |     |     |     |     |     |     |     |     |     |     |     |     |     |     |
| OsP1L6a   |     |     |     |     |     |     |     |     |     |     |     |     |     |     |     |     |     |     |
| OsP1L6b   |     |     |     |     |     |     |     |     |     |     |     |     |     |     |     |     |     |     |
| Consensus |     |     |     |     |     |     |     |     |     |     |     |     |     |     |     |     |     |     |
|           | 511 | 520 | 530 | 540 | 550 | 560 | 570 | 580 | 590 | 600 | 610 | 620 | 630 | 640 | 650 | 660 | 670 | 680 |
| OsP1M1a   |     |     |     |     |     |     |     |     |     |     |     |     |     |     |     |     |     |     |
| OsP1M1b   |     |     |     |     |     |     |     |     |     |     |     |     |     |     |     |     |     |     |
| AtP1N1    |     |     |     |     |     |     |     |     |     |     |     |     |     |     |     |     |     |     |
| AtP1N3    |     |     |     |     |     |     |     |     |     |     |     |     |     |     |     |     |     |     |
| AtP1N7    |     |     |     |     |     |     |     |     |     |     |     |     |     |     |     |     |     |     |
| AtP1N4    |     |     |     |     |     |     |     |     |     |     |     |     |     |     |     |     |     |     |
| AtP1N2    |     |     |     |     |     |     |     |     |     |     |     |     |     |     |     |     |     |     |
| AtP1N2    |     |     |     |     |     |     |     |     |     |     |     |     |     |     |     |     |     |     |
| OsP1N1c   |     |     |     |     |     |     |     |     |     |     |     |     |     |     |     |     |     |     |
| OsP1N1b   |     |     |     |     |     |     |     |     |     |     |     |     |     |     |     |     |     |     |
| AtP1N6    |     |     |     |     |     |     |     |     |     |     |     |     |     |     |     |     |     |     |
| OsP1M1a   |     |     |     |     |     |     |     |     |     |     |     |     |     |     |     |     |     |     |
| OsP1M1d   |     |     |     |     |     |     |     |     |     |     |     |     |     |     |     |     |     |     |
| OsP1N9    |     |     |     |     |     |     |     |     |     |     |     |     |     |     |     |     |     |     |
| AtP1N5a   |     |     |     |     |     |     |     |     |     |     |     |     |     |     |     |     |     |     |
| AtP1N5b   |     |     |     |     |     |     |     |     |     |     |     |     |     |     |     |     |     |     |
| OsP1N5c   |     |     |     |     |     |     |     |     |     |     |     |     |     |     |     |     |     |     |
| AtP1N8    |     |     |     |     |     |     |     |     |     |     |     |     |     |     |     |     |     |     |
| AtP1N8    |     |     |     |     |     |     |     |     |     |     |     |     |     |     |     |     |     |     |
| AtP1L1    |     |     |     |     |     |     |     |     |     |     |     |     |     |     |     |     |     |     |
| AtP1L3    |     |     |     |     |     |     |     |     |     |     |     |     |     |     |     |     |     |     |
| AtP1L4    |     |     |     |     |     |     |     |     |     |     |     |     |     |     |     |     |     |     |
| AtP1L1    |     |     |     |     |     |     |     |     |     |     |     |     |     |     |     |     |     |     |
| AtP1L5    |     |     |     |     |     |     |     |     |     |     |     |     |     |     |     |     |     |     |
| AtP1L7    |     |     |     |     |     |     |     |     |     |     |     |     |     |     |     |     |     |     |
| OsP1L5    |     |     |     |     |     |     |     |     |     |     |     |     |     |     |     |     |     |     |
| OsP1L7a   |     |     |     |     |     |     |     |     |     |     |     |     |     |     |     |     |     |     |
| OsP1L7b   |     |     |     |     |     |     |     |     |     |     |     |     |     |     |     |     |     |     |
| AtP1L2    |     |     |     |     |     |     |     |     |     |     |     |     |     |     |     |     |     |     |
| OsP1L2    |     |     |     |     |     |     |     |     |     |     |     |     |     |     |     |     |     |     |
| AtP1L6    |     |     |     |     |     |     |     |     |     |     |     |     |     |     |     |     |     |     |
| OsP1L6a   |     |     |     |     |     |     |     |     |     |     |     |     |     |     |     |     |     |     |
| OsP1L6b   |     |     |     |     |     |     |     |     |     |     |     |     |     |     |     |     |     |     |
| REGNVS    |     |     |     |     |     |     |     |     |     |     |     |     |     |     |     |     |     |     |
| OsP1L7a   |     |     |     |     |     |     |     |     |     |     |     |     |     |     |     |     |     |     |
| OsP1L7b   |     |     |     |     |     |     |     |     |     |     |     |     |     |     |     |     |     |     |
| AtP1L2    |     |     |     |     |     |     |     |     |     |     |     |     |     |     |     |     |     |     |
| OsP1L2    |     |     |     |     |     |     |     |     |     |     |     |     |     |     |     |     |     |     |
| AtP1L6    |     |     |     |     |     |     |     |     |     |     |     |     |     |     |     |     |     |     |
| OsP1L6a   |     |     |     |     |     |     |     |     |     |     |     |     |     |     |     |     |     |     |
| OsP1L6b   |     |     |     |     |     |     |     |     |     |     |     |     |     |     |     |     |     |     |
